# Supplementary material
Source: PubMed Central journal article supplement (PMC6625615)
Supplement: CJN.14471218SupplementaryData.pdf [file CJN.14471218SupplementaryData.pdf]

Supplemental material is neither peer-reviewed nor thoroughly edited by CJASN. The authors alone are responsible for the accuracy and presentation of the material.

## **Supplemental material table of contents**

**Supplemental Figure 1.** Examples of the study groups and excluded cases.

**Supplemental Method 1.** Collected data and variable definition.

**Supplemental Table 1.** Baseline characteristics of people with pre-dialysis chronic kidney disease according to their stages of chronic kidney disease.

**Supplemental Table 2.** Incidence and risk of tuberculosis in subgroups divided according to place of residence.

**Supplemental Table 3.** Incidences and risks of pulmonary, non-pulmonary and military tuberculosis.

**Supplemental Figure 1.** Examples of the study groups and excluded cases.

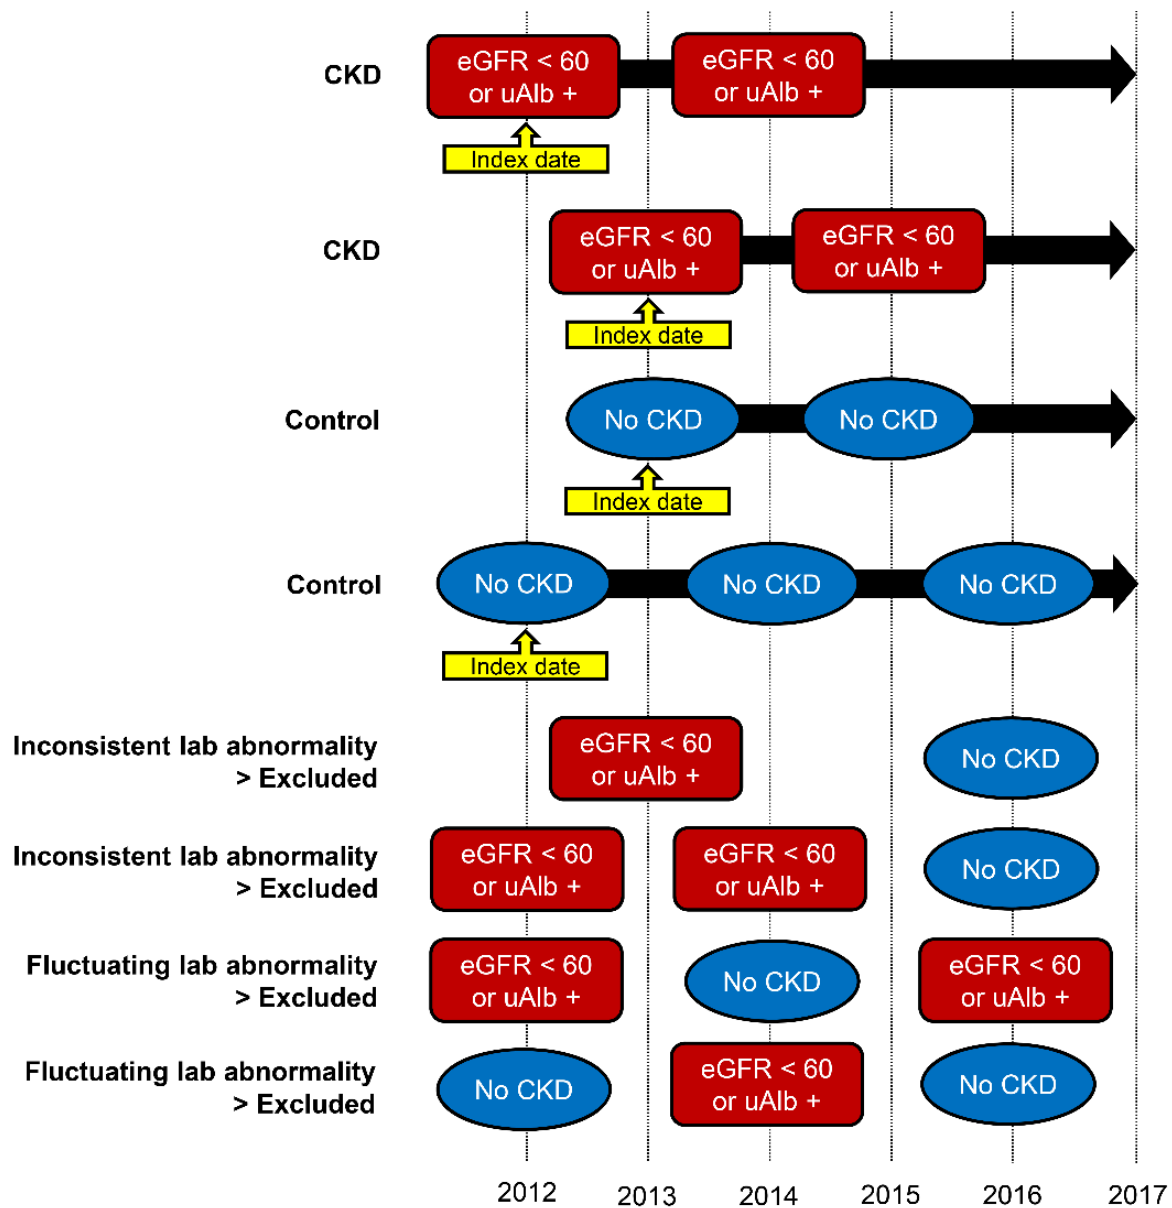

The examples of the study population and the excluded cases. The first examination date during the study period was the index date in which baseline information was collected and follow-up was initiated. Additional lab results indicative of CKD or control group were necessary for inclusion, as we intended to analyze those with “chronic” kidney dysfunction in compared to those who were consistently free from CKD indicative lab findings. Those with inconsistent or fluctuating lab abnormalities were excluded. CKD indicative lab findings were eGFR < 60 mL/min/1.73 m<sup>2</sup> or presence of dipstick albuminuria ≥ 1+. The example visits with CKD indicative lab findings were shown as red rounded squares, and those without CKD indicative lab findings were shown as blue ellipses.

CKD = chronic kidney disease, eGFR = estimated glomerular filtration rate (mL/min/1.73 m<sup>2</sup>), uAlb = dipstick albuminuria.

### **Supplemental Method 1. Collected data and variable definition.**

Baseline information, including age, sex, low-income status, history of smoking, body mass index, and systolic/diastolic blood pressure, were collected. A low-income status was defined as when one's income is less than the 20<sup>th</sup> percentile in the nation. The place of residence was stratified into urban and rural areas, and government-designated metropolitan cities and capital area were included in the urban region. We used the MDRD equation to calculate the eGFR values. History of immunosuppressant usage was considered present when prescription of immunosuppressive medication, including systemic corticosteroids, cyclophosphamides, tacrolimus, cyclosporine, everolimus, sirolimus, mycophenolic acid, azathioprine, rituximab, and anti-TNF alpha blockades, was present for more than total 30 days within 3 years before inclusion. The underlying comorbidity of hypertension and diabetes mellitus was identified with the corresponding ICD-10 diagnostic codes and usage of relevant medications (1). Other comorbidities, including congestive heart failure, dementia, peripheral vascular disease, dementia, liver disease, cancer, and chronic obstructive pulmonary disease were identified with the applied ICD-10 diagnostic codes. In the CKD group, presence of applied ICD-10 diagnosis codes for "clinical diagnosis for glomerular or tubulointerstitial disease" was identified to define the variable, as nephrotic syndrome or primary glomerular or tubulointerstitial diseases may present differently according to CKD stages. The following was the used ICD-10 diagnostic codes to determine the variables, and we considered a comorbidity was present when the diagnostic codes were present for  $\geq 2$  times within 3 years before inclusion (1).

- Kidney disease codes which were used to exclude people with underlying possible chronic kidney disease before constructing the matched control group: N03, N052, N053, N054, N055, N056, N072, N073, N074, N01, N18, N19, N25.
- Peripheral vascular disease: I71, I790, I739, R02, Z958, Z959
- Congestive heart failure: I50
- Dementia: F00, F01, F02, F051
- Liver disease: K702, K703, K73, K717, K740, K742, K746, K743, K744, K745
- Cancer: C0, C1, C2, C3, C40, C41, C43, C45, C46, C47, C48, C49, C5, C6, C70, C71, C72, C74, C75, C76, C80, C81, C82, C83, C84, C85, C883, C887, C889, C900, C901, C91, C92, C93, C940, C941, C942, C943, C9451, C947, C95, C96
- Chronic obstructive pulmonary disease: J41, J42, J43, J44
- Glomerular or tubulointerstitial disease: N00, N01, N02, N03, N04, N05, N06, N07, N08, N09, N10, N11, N12, N13, N14, N15, N16

(1) Reference: Sundararajan V, Henderson T, Perry C, Muggivan A, Quan H, Ghali WA. New ICD-10 version of the Charlson comorbidity index predicted in-hospital mortality. *J Clin Epidemiol* 57:1288-1294, 2004

**Supplemental Table 1.** Baseline characteristics of people with pre-dialysis chronic kidney disease according to their stages of chronic kidney disease.

|                                                                 | Stage 1 (N=35,088) | Stage 2 (N=55,456) | Stage 3 (N=306,127) | Stage 4/5 without dialysis (N=12,202) | P       |
|-----------------------------------------------------------------|--------------------|--------------------|---------------------|---------------------------------------|---------|
| Age (years)                                                     | 48 [39-58]         | 54 [44-64]         | 68 [61-74]          | 66 [56-74]                            | <0.001  |
| Male Sex                                                        | 11,666 (33)        | 16,813 (30)        | 165,931 (54)        | 6,282 (52)                            | <0.001  |
| Low income                                                      | 6,946 (20)         | 11,241 (20)        | 68,446 (22)         | 2,908 (24)                            | <0.001  |
| Smoking history                                                 |                    |                    |                     |                                       | <0.001  |
| Never                                                           | 16,750 (48)        | 27,183 (49)        | 213,969 (70)        | 8,311 (68)                            |         |
| Previous                                                        | 6,633 (19)         | 12,901 (23)        | 56,509 (19)         | 2,395 (20)                            |         |
| Current                                                         | 11,705 (33)        | 15,372 (28)        | 35,649 (12)         | 1,496 (12)                            |         |
| Body mass index (kg/m <sup>2</sup> )                            | 25.1 [22.5-28.0]   | 25.1 [22.9-27.5]   | 24.5 [22.5-26.6]    | 24 (21.9-26.3)                        | <0.001  |
| Place of residence                                              |                    |                    |                     |                                       | < 0.001 |
| Urban                                                           | 16,552 (47)        | 26,267 (47)        | 134,614 (44)        | 5,209 (43)                            |         |
| Rural                                                           | 18,536 (53)        | 29,189 (53)        | 171,513 (56)        | 6,993 (57)                            |         |
| Immunosuppressant usage                                         | 4,661(13)          | 8,011(14)          | 63,453(21)          | 2,450(20)                             | < 0.001 |
| Hypertension                                                    | 17,706 (51)        | 34,072 (61)        | 214,480 (70.1)      | 10,774 (88)                           | <0.001  |
| Diabetes mellitus                                               | 12,994 (37)        | 21,184 (38.2)      | 95,862 (31.3)       | 5,265 (43)                            | <0.001  |
| Creatinine (mg/dL)                                              | 0.8 [0.7-0.9]      | 1.0 [0.9-1.1]      | 1.3 [1.1-1.4]       | 2.5 [2.1-3.2]                         | <0.001  |
| eGFR (mL/min/1.73 m <sup>2</sup> )                              | 103 [94-114]       | 75 [68-81]         | 53 [47-57]          | 24 [18-27]                            | <0.001  |
| Dipstick albuminuria                                            |                    |                    |                     |                                       | <0.001  |
| None or trace                                                   | 0 (0)              | 0 (0)              | 270,958 (89)        | 6,586 (54)                            |         |
| 1+                                                              | 20,436 (58)        | 29,700 (54)        | 17,599 (6)          | 2,082 (17)                            |         |
| ≥ 2+                                                            | 14,652 (42)        | 25,756 (46)        | 17,570 (6)          | 3,534 (29)                            |         |
| Congestive heart failure                                        | 487 (1)            | 1,279 (2)          | 16,878 (6)          | 1,115 (9)                             | <0.001  |
| Dementia                                                        | 237 (1)            | 681 (1)            | 13,816 (5)          | 612 (5)                               | <0.001  |
| Peripheral vascular disease                                     | 2,466 (7)          | 5,549 (10)         | 49,708 (16)         | 2,240 (18)                            | <0.001  |
| Cancer                                                          | 1,006 (3)          | 2,320 (4)          | 20,594 (7)          | 875 (7)                               | <0.001  |
| Liver disease                                                   | 705 (2)            | 1,167 (2)          | 6,281 (2)           | 278 (2)                               | <0.001  |
| Chronic obstructive pulmonary disease                           | 4,180 (12)         | 8,168 (15)         | 72,135 (24)         | 2,944 (24)                            | <0.001  |
| Clinical diagnosis for glomerular or tubulointerstitial disease | 3,871 (11)         | 7,570 (14)         | 40,368 (13)         | 3,834 (31)                            | <0.001  |

eGFR = estimated glomerular filtration rate

Stages of CKD were determined as stage 1 (eGFR  $\geq$  90 mL/min/1.73 m<sup>2</sup> with consecutive albuminuria), stage 2 (eGFR  $\geq$  60 and  $<$  90 mL/min/1.73 m<sup>2</sup> with consecutive albuminuria), stage 3 (eGFR  $\geq$  30 and  $<$  60 mL/min/1.73 m<sup>2</sup>), and stage 4/5 without dialysis (eGFR  $<$  30 mL/min/1.73 m<sup>2</sup> but not on dialysis).

**Supplemental Table 2.** Incidence and risk of tuberculosis in subgroups divided according to place of residence.

|                               | N of TB/total | Incidence rate<br>(/100,000PY) | Univariable      |         | Model 1 <sup>a</sup> |         | Model 2 <sup>b</sup> |         |
|-------------------------------|---------------|--------------------------------|------------------|---------|----------------------|---------|----------------------|---------|
|                               |               |                                | HR (95% CI)      | P       | Adjusted HR (95% CI) | P       | Adjusted HR (95% CI) | P       |
| <b>Rural area</b>             |               |                                |                  |         |                      |         |                      |         |
| Matched control               | 943/233,428   | 131.8                          | Reference        |         | Reference            |         | Reference            |         |
| Pre-dialysis CKD <sup>c</sup> | 1,026/226,231 | 148.5                          | 1.13 (1.03-1.23) | 0.007   | 1.13 (1.04-1.24)     | 0.006   | 1.25 (1.14-1.37)     | < 0.001 |
| Stage 1                       | 58/18,536     | 114.7                          | 0.88 (0.68-1.15) | 0.36    | 1.48 (1.13-1.93)     | 0.005   | 1.74 (1.32-2.29)     | < 0.001 |
| Stage 2                       | 75/29,189     | 89.1                           | 0.68 (0.54-0.86) | 0.001   | 0.91 (0.72-1.15)     | 0.43    | 1.07 (0.84-1.36)     | 0.60    |
| Stage 3                       | 839/171,513   | 157.2                          | 1.19 (1.09-1.31) | < 0.001 | 1.11 (1.01-1.22)     | 0.03    | 1.22 (1.11-1.34)     | < 0.001 |
| Stage 4/5<br>without dialysis | 54/6,993      | 241.9                          | 1.83 (1.39-2.41) | < 0.001 | 1.82 (1.39-2.40)     | < 0.001 | 1.76 (1.34-2.32)     | < 0.001 |
| <b>Urban area</b>             |               |                                |                  |         |                      |         |                      |         |
| Matched control               | 575/175,445   | 108.4                          | Reference        |         | Reference            |         | Reference            |         |
| Pre-dialysis CKD <sup>c</sup> | 678/182,642   | 123.7                          | 1.14 (1.02-1.28) | 0.02    | 1.13 (1.01-1.26)     | 0.03    | 1.17 (1.04-1.31)     | 0.009   |
| Stage 1                       | 59/16,552     | 131.8                          | 1.21 (0.93-1.59) | 0.16    | 1.80 (1.37-2.36)     | < 0.001 | 1.86 (1.41-2.46)     | < 0.001 |
| Stage 2                       | 82/26,267     | 109.4                          | 1.01 (0.80-1.27) | 0.94    | 1.23 (0.97-1.55)     | 0.09    | 1.31 (1.03-1.66)     | 0.03    |
| Stage 3                       | 497/134,614   | 120.7                          | 1.11 (0.99-1.26) | 0.08    | 1.03 (0.92-1.17)     | 0.60    | 1.07 (0.95-1.21)     | 0.28    |
| Stage 4/5<br>without dialysis | 40/5,209      | 241.2                          | 2.23 (1.62-3.07) | < 0.001 | 2.20 (1.60-3.03)     | < 0.001 | 1.97 (1.43-2.72)     | < 0.001 |

TB = tuberculosis, PY = person-years, HR = hazard ratio, CI = confidence interval, CKD = chronic kidney disease

<sup>a</sup>Model 1 was adjusted for age, sex, low-income states, and smoking histories

<sup>b</sup>Model 2 was adjusted for age, sex, low-income status, smoking histories, place of residence (urban or rural), history of diabetes mellitus, hypertension, cancer, chronic obstructive pulmonary disease, immunosuppressants usage history, and baseline body mass index.

<sup>c</sup>Stages of CKD were determined as stage 1 (eGFR  $\geq$  90 mL/min/1.73 m<sup>2</sup> with consecutive albuminuria), stage 2 (eGFR  $\geq$  60 and < 90 mL/min/1.73 m<sup>2</sup> with consecutive albuminuria), stage 3 (eGFR  $\geq$  30 and < 60 mL/min/1.73 m<sup>2</sup>), and stage 4/5 without dialysis (eGFR < 30 mL/min/1.73 m<sup>2</sup> but not on dialysis).

**Supplemental Table 3.** Incidences and risks of pulmonary, non-pulmonary and military tuberculosis.

|                               | N of according TB/total | Incidence rate (/100,000 PY) | Univariable       |         | Model 1 <sup>a</sup> |         | Model 2 <sup>b</sup> |         |
|-------------------------------|-------------------------|------------------------------|-------------------|---------|----------------------|---------|----------------------|---------|
|                               |                         |                              | HR (95% CI)       | P       | Adjusted HR (95% CI) | P       | Adjusted HR (95% CI) | P       |
| <b>Pulmonary TB</b>           |                         |                              |                   |         |                      |         |                      |         |
| Matched control               | 1,376/408,873           | 110.5                        | Reference         |         | Reference            |         | Reference            |         |
| Pre-dialysis CKD <sup>c</sup> | 1,522/408,873           | 122.9                        | 1.11 (1.04-1.20)  | 0.004   | 1.12 (1.04-1.20)     | 0.003   | 1.25 (1.14-1.37)     | < 0.001 |
| Stage 1                       | 108/35,088              | 113.3                        | 1.04 (0.85-1.26)  | 0.73    | 1.68 (1.37-2.05)     | < 0.001 | 1.74 (1.32-2.29)     | < 0.001 |
| Stage 2                       | 138/55,456              | 86.7                         | 0.79 (0.66-0.94)  | 0.008   | 1.02 (0.86-1.22)     | 0.81    | 1.07 (0.84-1.36)     | 0.60    |
| Stage 3                       | 1,202/306,127           | 127.1                        | 1.15 (1.07-1.24)  | < 0.001 | 1.07 (0.99-1.16)     | 0.08    | 1.22 (1.11-1.36)     | < 0.001 |
| Stage 4/5 without dialysis    | 74/12,202               | 190.2                        | 1.72 (1.36-2.18)  | < 0.001 | 1.71 (1.35-2.16)     | < 0.001 | 1.77 (1.34-2.33)     | < 0.001 |
| <b>Non-pulmonary TB</b>       |                         |                              |                   |         |                      |         |                      |         |
| Matched control               | 187/408,873             | 15.0                         | Reference         |         | Reference            |         | Reference            |         |
| Pre-dialysis CKD <sup>c</sup> | 238/408,873             | 19.2                         | 1.28 (1.06-1.55)  | 0.01    | 1.28 (1.06-1.55)     | 0.01    | 1.38(1.13-1.68)      | 0.001   |
| Stage 1                       | 13/35,088               | 13.6                         | 0.91 (0.52-1.59)  | 0.73    | 1.09 (0.61-1.94)     | 0.77    | 1.13 (0.63-2.10)     | 0.62    |
| Stage 2                       | 27/55,456               | 17.0                         | 1.13 (0.75-1.69)  | 0.56    | 1.30 (0.86-1.96)     | 0.22    | 1.44 (0.95-2.19)     | 0.09    |
| Stage 3                       | 176/306,127             | 18.6                         | 1.24 (1.01-1.52)  | 0.04    | 1.20 (0.97-1.47)     | 0.09    | 1.29 (1.04-1.60)     | 0.02    |
| Stage 4/5 without dialysis    | 22/12,202               | 56.5                         | 3.77 (2.43-5.87)  | < 0.001 | 3.74 (2.41-5.82)     | < 0.001 | 3.84 (2.44-6.04)     | < 0.001 |
| <b>Military TB</b>            |                         |                              |                   |         |                      |         |                      |         |
| Matched control               | 16/408,873              | 1.28                         | Reference         |         | Reference            |         | Reference            |         |
| Pre-dialysis CKD <sup>c</sup> | 34/408,873              | 2.74                         | 2.14 (1.18-3.87)  | 0.01    | 2.14 (1.18-3.88)     | 0.01    | 2.20 (1.16-4.11)     | 0.01    |
| Stage 1                       | 2/35,088                | 2.10                         | 1.65 (0.38-7.17)  | 0.51    | 3.02 (0.68-13.45)    | 0.15    | 3.40 (0.80-15.08)    | 0.10    |
| Stage 2                       | 4/55,456                | 2.51                         | 1.97 (0.66-5.88)  | 0.23    | 2.71 (0.89-8.22)     | 0.08    | 2.96 (0.96-9.20)     | 0.06    |
| Stage 3                       | 24/306,127              | 2.54                         | 1.98 (1.05-3.72)  | 0.04    | 1.82 (0.97-3.42)     | 0.07    | 1.90 (0.99-3.65)     | 0.06    |
| Stage 4/5 without dialysis    | 4/12,202                | 10.3                         | 7.97 (2.66-23.82) | < 0.001 | 7.84 (2.62-23.46)    | < 0.001 | 7.02 (2.29-21.64)    | < 0.001 |

TB = tuberculosis, PY = person-years, HR = hazard ratio, CI = confidence interval, CKD = chronic kidney disease

<sup>a</sup>Model 1 was adjusted for age, sex, low income, and smoking histories

<sup>b</sup>Model 2 was adjusted for age, sex, low-income status, smoking histories, place of residence (urban or rural), history of diabetes mellitus, hypertension, cancer, chronic obstructive pulmonary disease, immunosuppressants usage history, and baseline body mass index.

<sup>c</sup>Stages of CKD was determined as stage 1 (eGFR  $\geq$  90 mL/min/1.73 m<sup>2</sup> with consecutive albuminuria), stage 2 (eGFR  $\geq$  60 and < 90 mL/min/1.73 m<sup>2</sup> with consecutive albuminuria), stage 3 (eGFR  $\geq$  30 and < 60 mL/min/1.73 m<sup>2</sup>), and stage 4/5 without dialysis (eGFR < 30 mL/min/1.73 m<sup>2</sup> but not on dialysis).
